# Supplementary material for: PTPN22 R620W gene editing in T cells enhances low-avidity TCR responses
Source: eLife. 2023 Mar 24;12:e81577. doi: 10.7554/eLife.81577 (PMC10065793; doi:10.7554/eLife.81577)
Supplement: Source data 3. [file elife-81577-data3.xlsx]

## Sheet: Sheet1
Genotyping Primers
PTPN22 Exon 14 locus Forward	CCTCCTGGGTTTGTACCTTAAGAG
PTPN22 Exon 14 locus Reverse	CAATGAACTCCTCAAACTCAAGGC
ddPCR primers
PTPN22 Exon 14 locus forward	ATAAGCAAAAACCTCCTGGG
PTPN22 Exon 14 locus reverse	GCCTCAATGAACTCCTCAAA
B2M forward	CGUCAUCCAGCAGAGAAUGG
B2M reverse	CGGCAGGCATACTCATCTTTT
ddPCR Probes (Bolded nucleotides indicate LNA modification)		Tags
PTPN22 Exon 14 ddPCR WT	TCCACTTCCTGTACGGACACC	5' Hex, 3' BHQ1
PTPN22 Exon 14 ddPCR Non-Risk	CCTGTCAGGACACCTGAA	5' Fam, 3' BHQ1
PTPN22 Exon 14 ddPCR Risk	CCTGTCTGGACACCTGAA	5' Fam, 3' BHQ1
PTPN22 Exon 14 ddPCR KO	CTTCCTGTATAAGTGACTAGCGGAC	5' Fam, 3' BHQ1
PTPN22 Exon 14 ddPCR Non-Risk	CTGTCAGGACACCTGAA	5' Hex, 3' BHQ1
PTPN22 Exon 14 ddPCR Risk	CTGTCTGGACACCTGAA	5' Fam, 3' BHQ1
ssODN Sequences (* indicates phosphorothioate linkages)
PTPN22 Exon 14 Non-risk ssODN	T*T*CTAATTAACAATTGTTACAATATTTTTGACATTTTGGATAGCAACTGCTCCAAGGATAGATGATGAAATCCCCCCTCCACTTCCTGTCAGGACACCTGAATCATTTATTGTGGTTG*A*G
PTPN22 Exon 14 Risk ssODN	T*T*CTAATTAACAATTGTTACAATATTTTTGACATTTTGGATAGCAACTGCTCCAAGGATAGATGATGAAATCCCCCCTCCACTTCCTGTCTGGACACCTGAATCATTTATTGTGGTTG*A*G
PTPN22 Exon 14 KO ssODN	T*T*CTAATTAACAATTGTTACAATATTTTTGACATTTTGGATAGCAACTGCTCCAAGGATAGATGATGAAATCCCCCCTCCACTTCCTGTATAAGTGACTAGCGGACACCTGAATCATTTATTGTGGTTG*A*G
