# Supplementary material for: PTPN22 R620W gene editing in T cells enhances low-avidity TCR responses
Source: eLife journal article supplement (doi:10.7554/elife.81577), 2023-03-22

Anti-PTPN22  
Blot 1  
Donor 1

Gene Editing variation  
samples (Ignore).

Mock Edit

PTPN22 Control Edit

PTPN22 Risk Var. Edit

PTPN22 KO Edit

Separate Experiment (Ignore).

← PTPN22

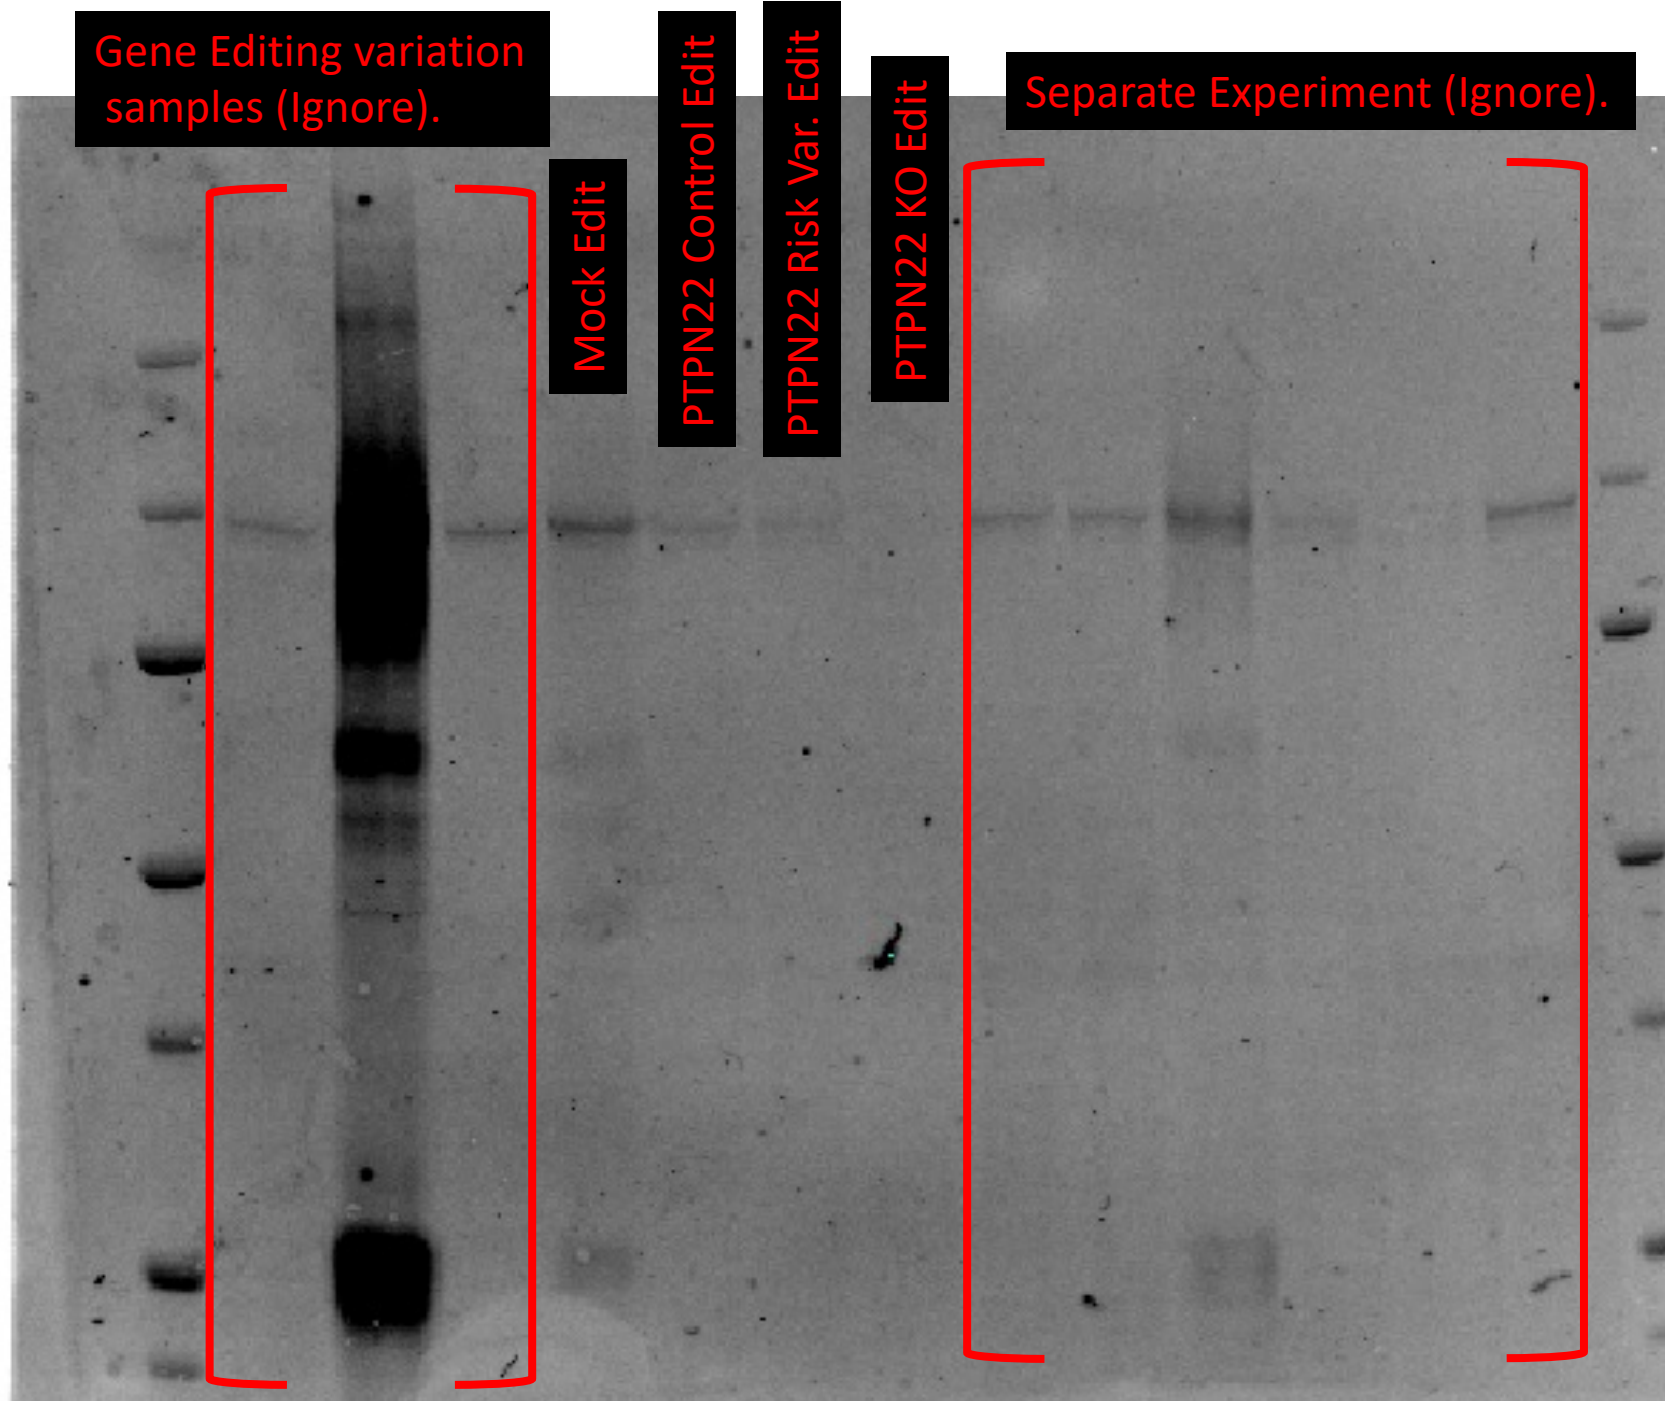

Anti-PTPN22  
Blot 2  
Donors 2 and 3

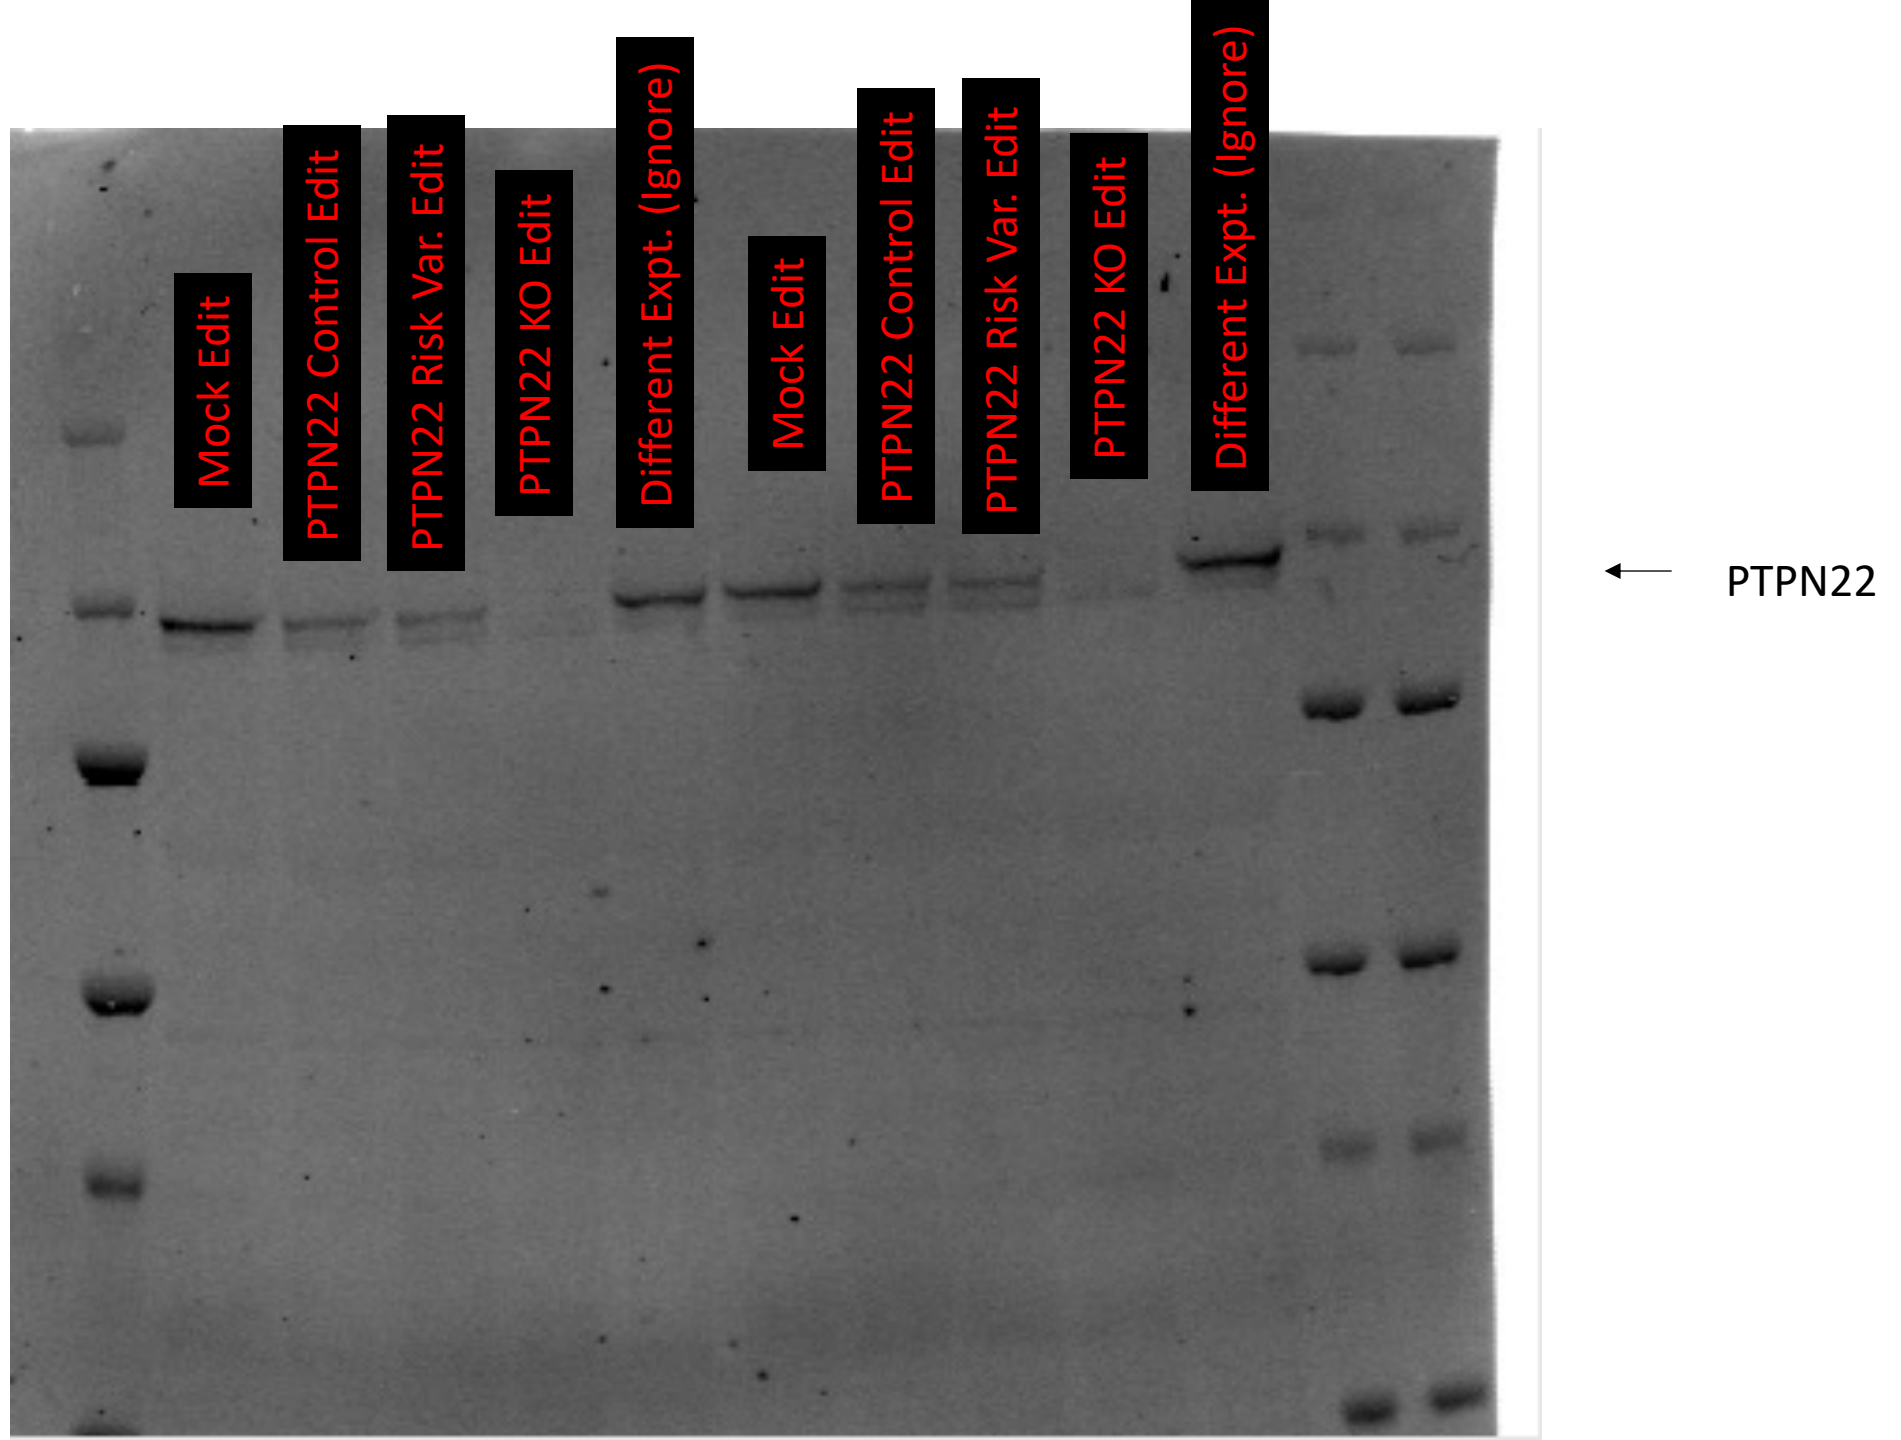

Anti-Actin  
Blot 1  
Donor 1

Gene Editing variation  
samples (Ignore).

Separate Experiment (Ignore).

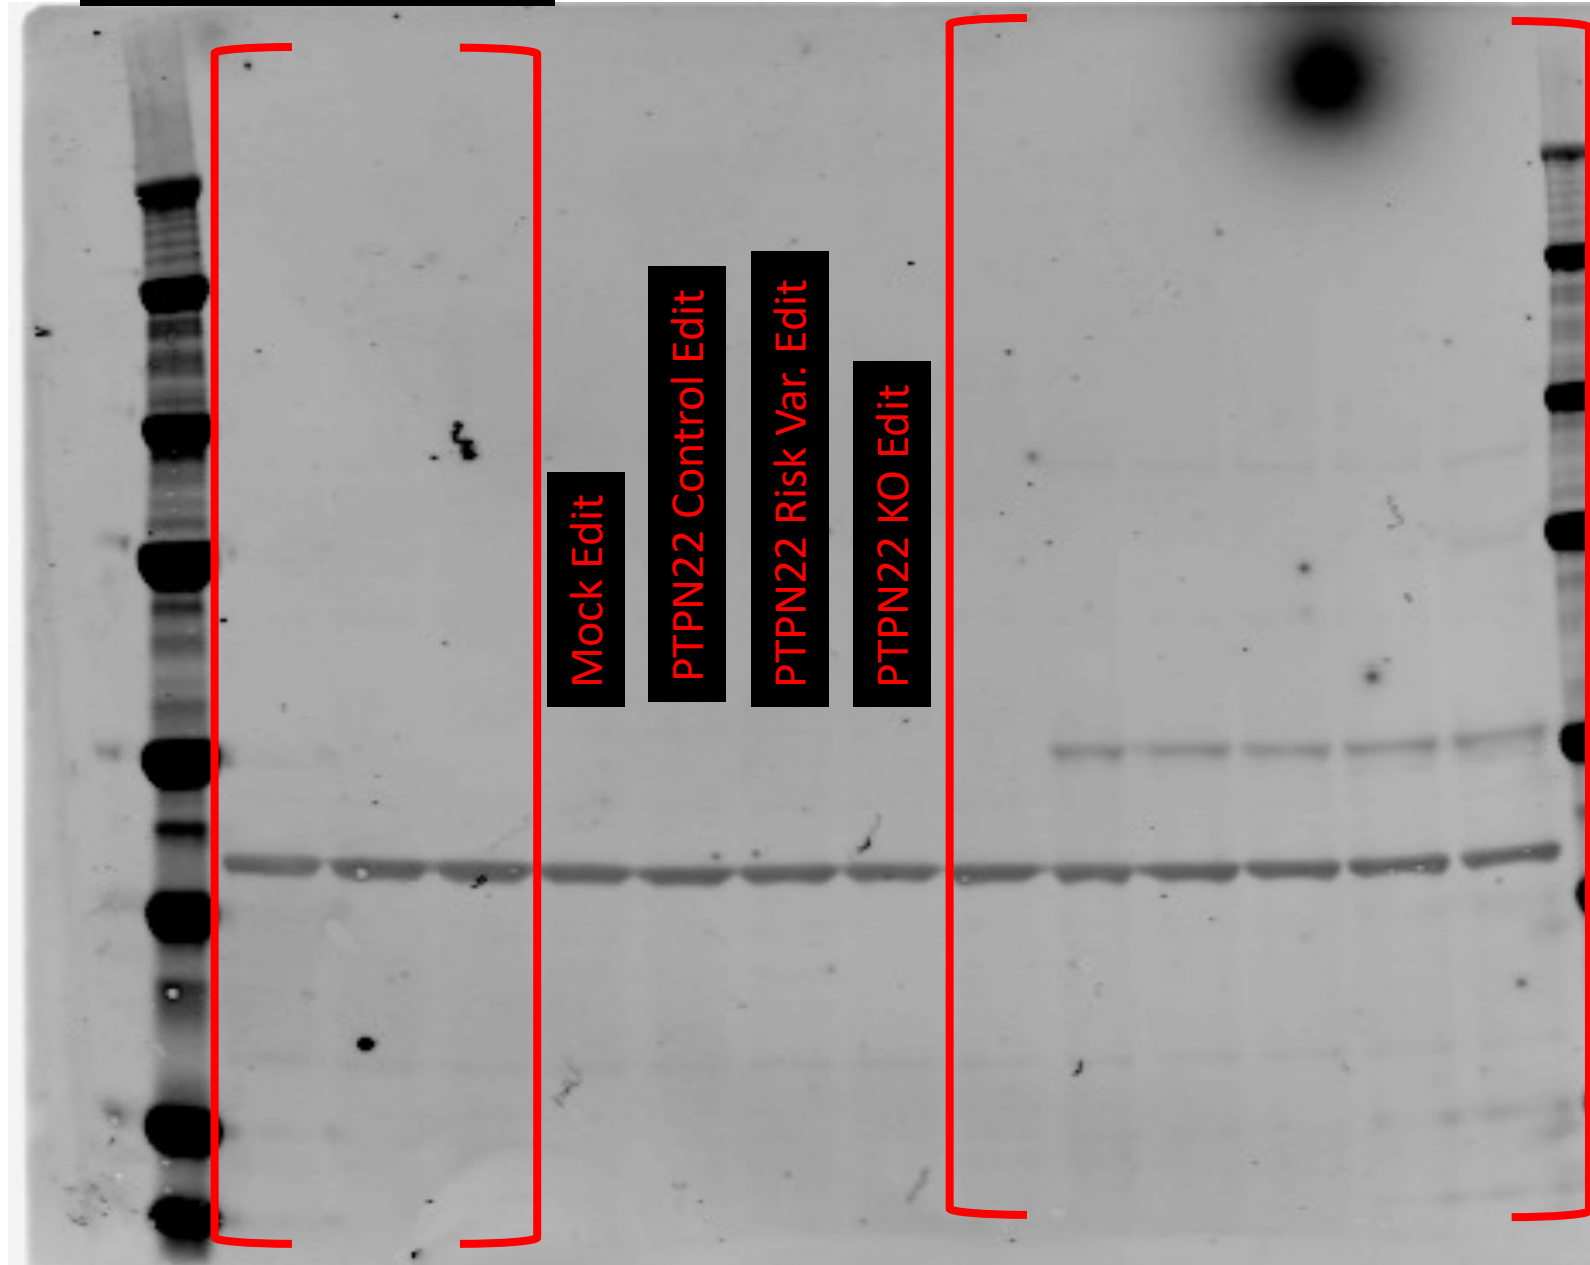

← Actin

Anti-Actin  
Blot 2  
Donor 2 and 3

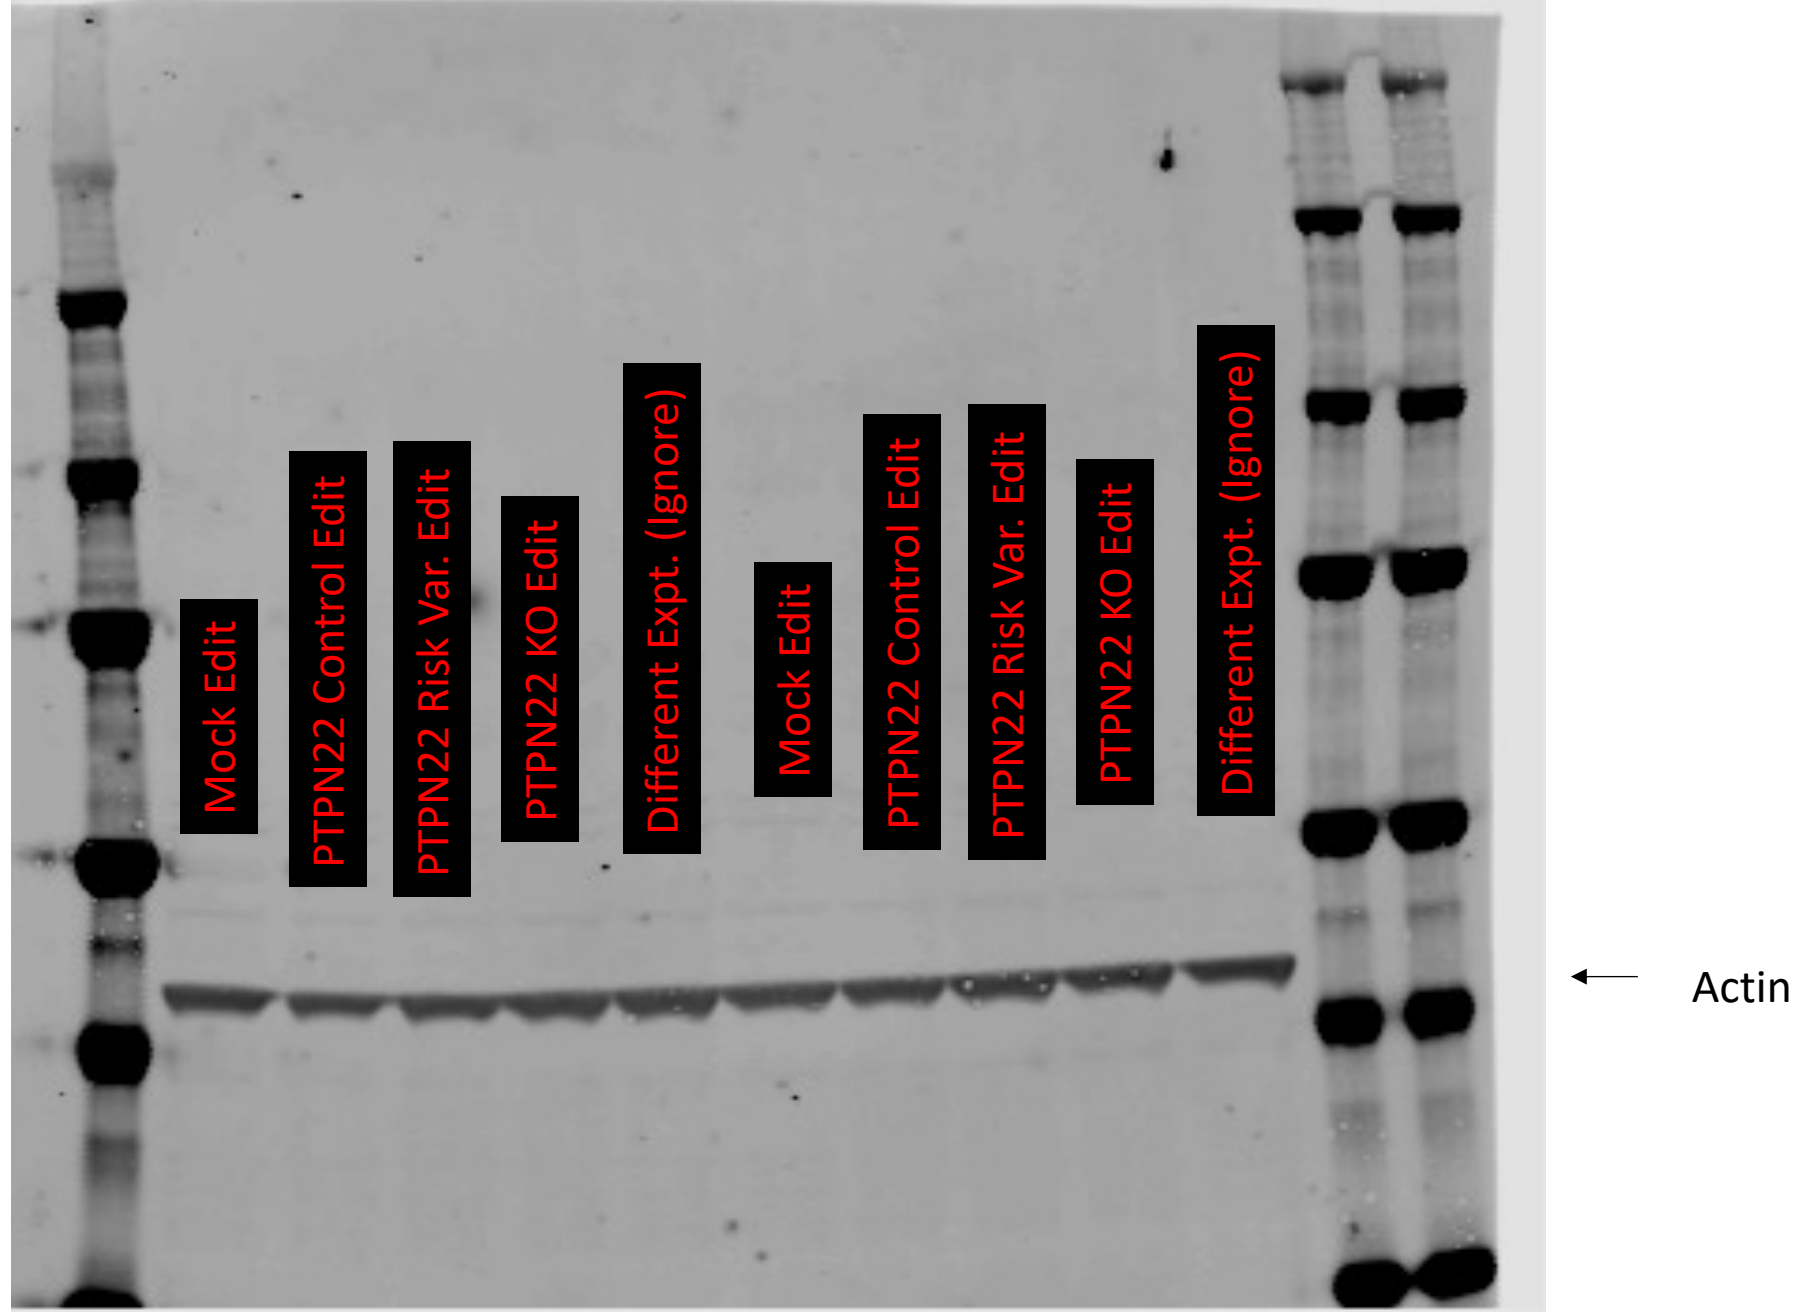

Supplement: supp [file elife-81577-supp-v1.zip]
