# Supplementary figures and images for: PTPN22 R620W gene editing in T cells enhances low-avidity TCR responses
Source: eLife journal article supplement (doi:10.7554/elife.81577), 2023-03-22

Figure 3 - Figure supplement 5

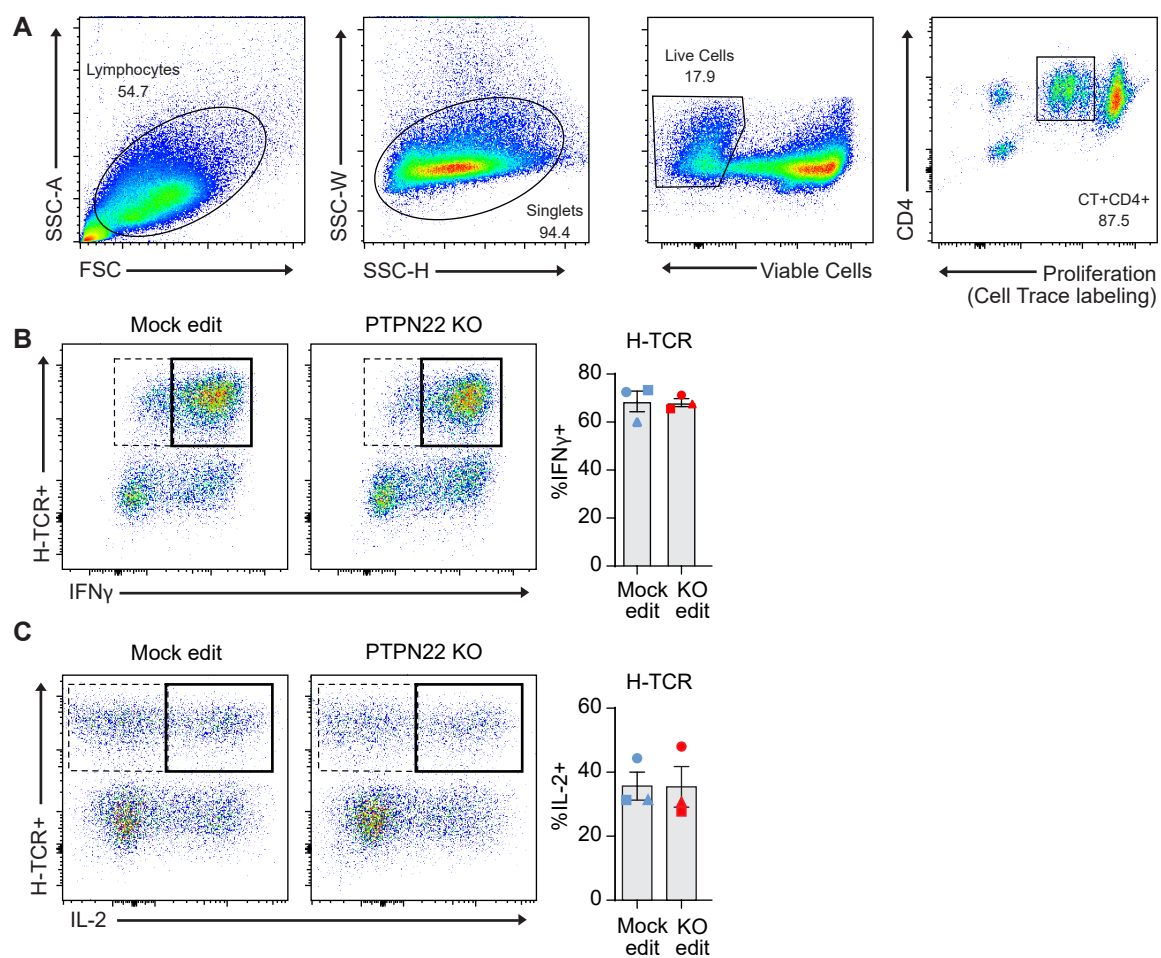

Supplement: supp [file elife-81577-supp-v1.zip]

Figure 2 - Figure supplement 2

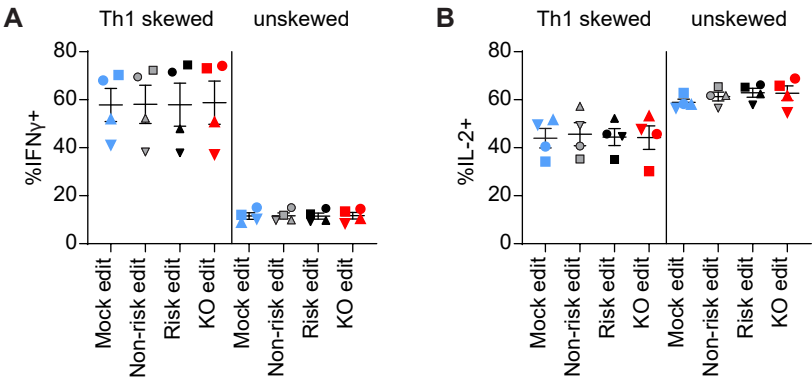

Supplement: supp [file elife-81577-supp-v1.zip]

Figure 6 - Figure supplement 6

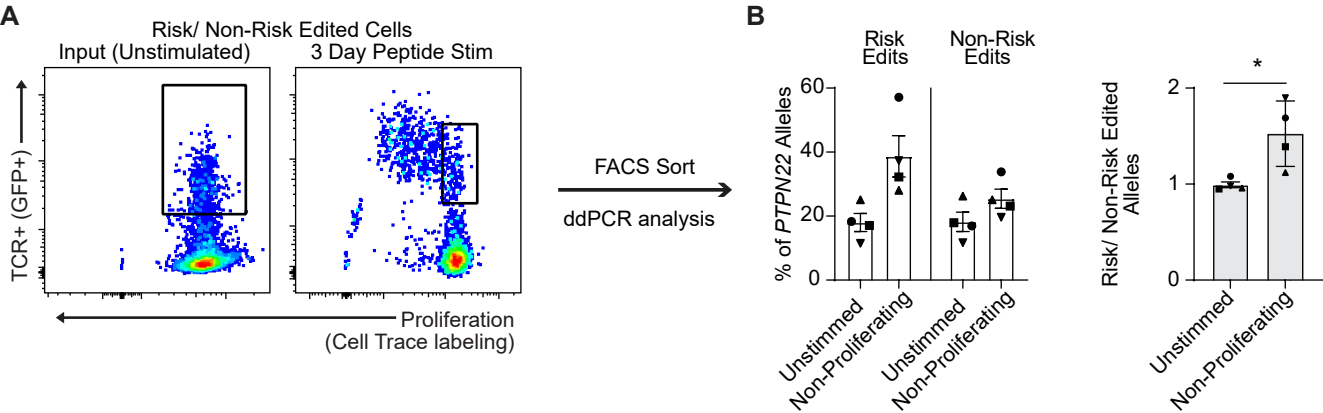

Supplement: supp [file elife-81577-supp-v1.zip]

Figure 1 - Figure supplement 1

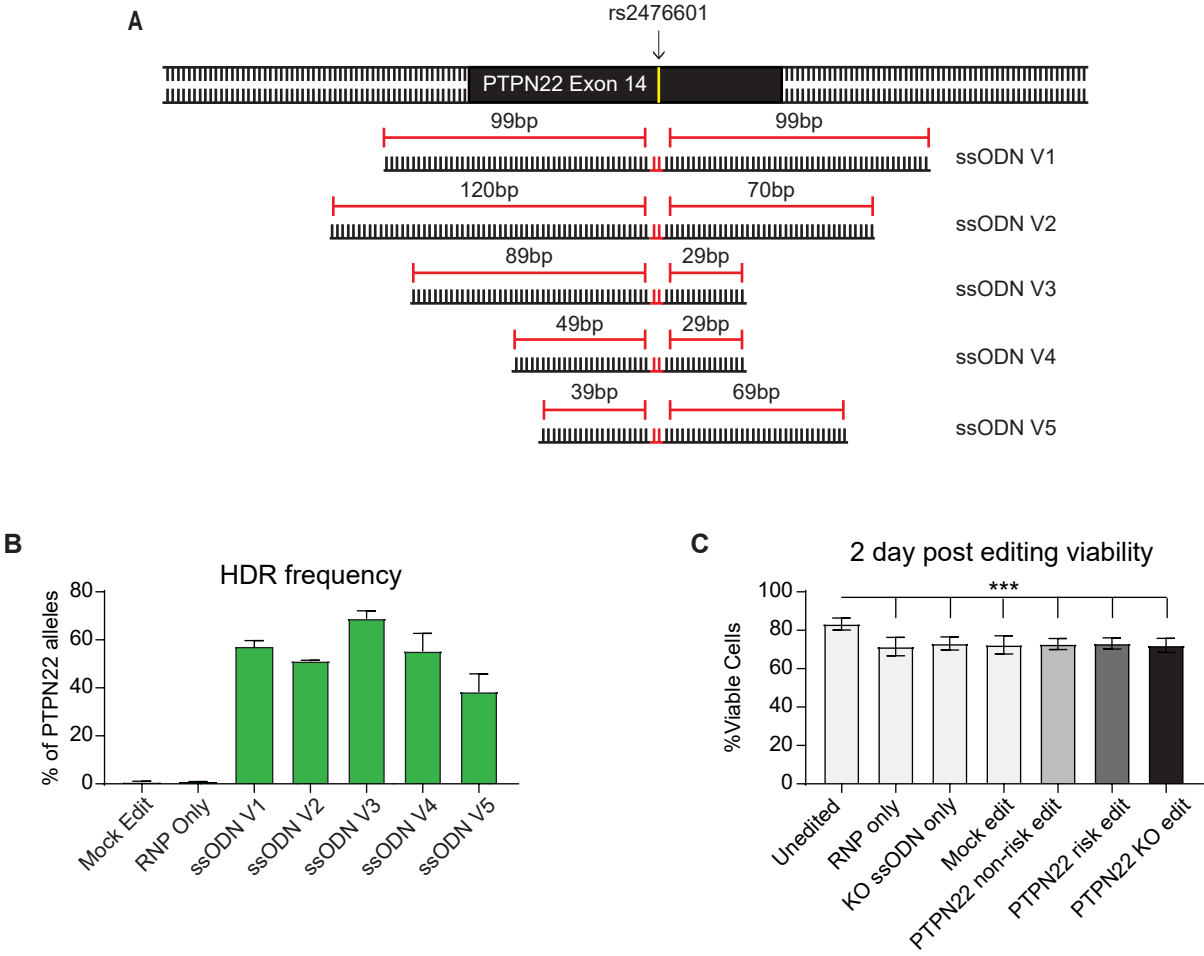

Supplement: supp [file elife-81577-supp-v1.zip]

Figure 3 - Figure supplement 4

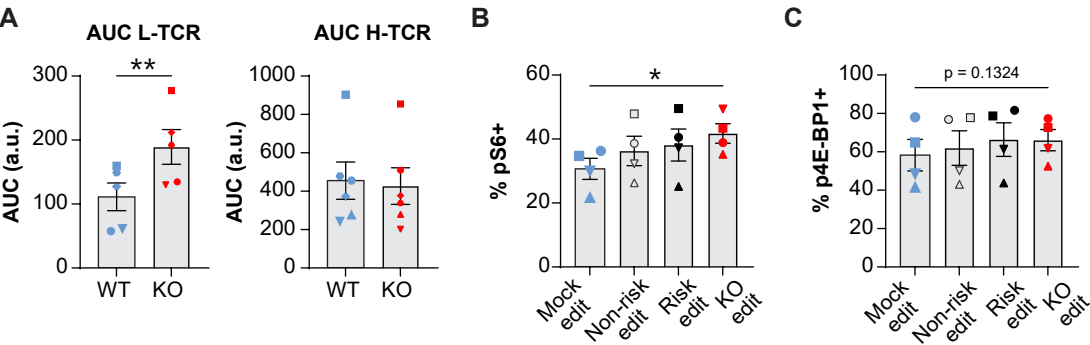

Supplement: supp [file elife-81577-supp-v1.zip]
